# Supplementary material
Source: Springer Nature journal article supplement (http://www.springermedizin.de/resource/supplementary/13075_2011_3850_MOESM6_ESM.pdf/9694858)

**A**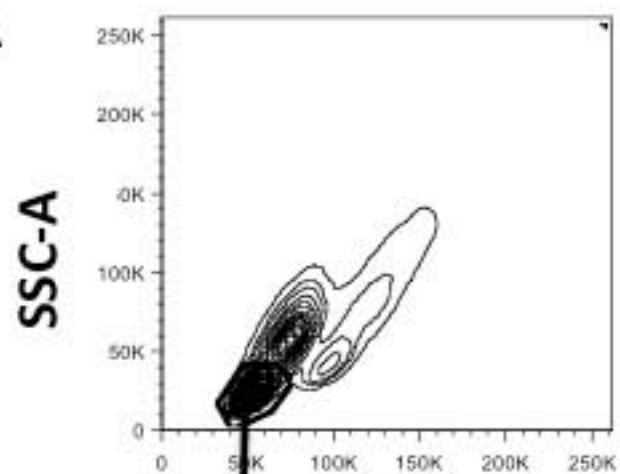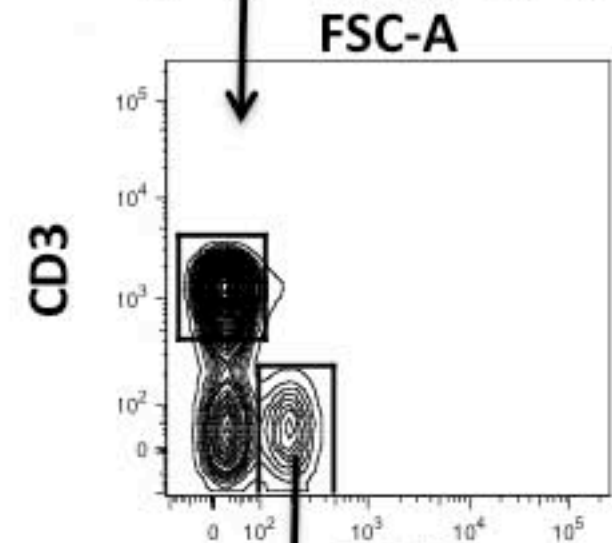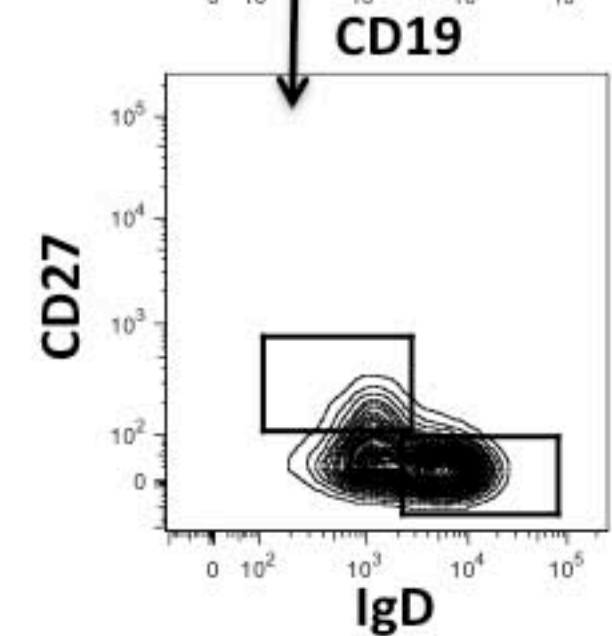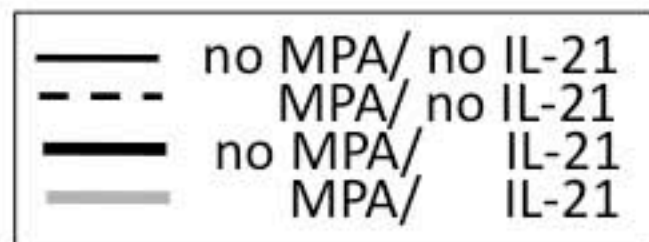**B**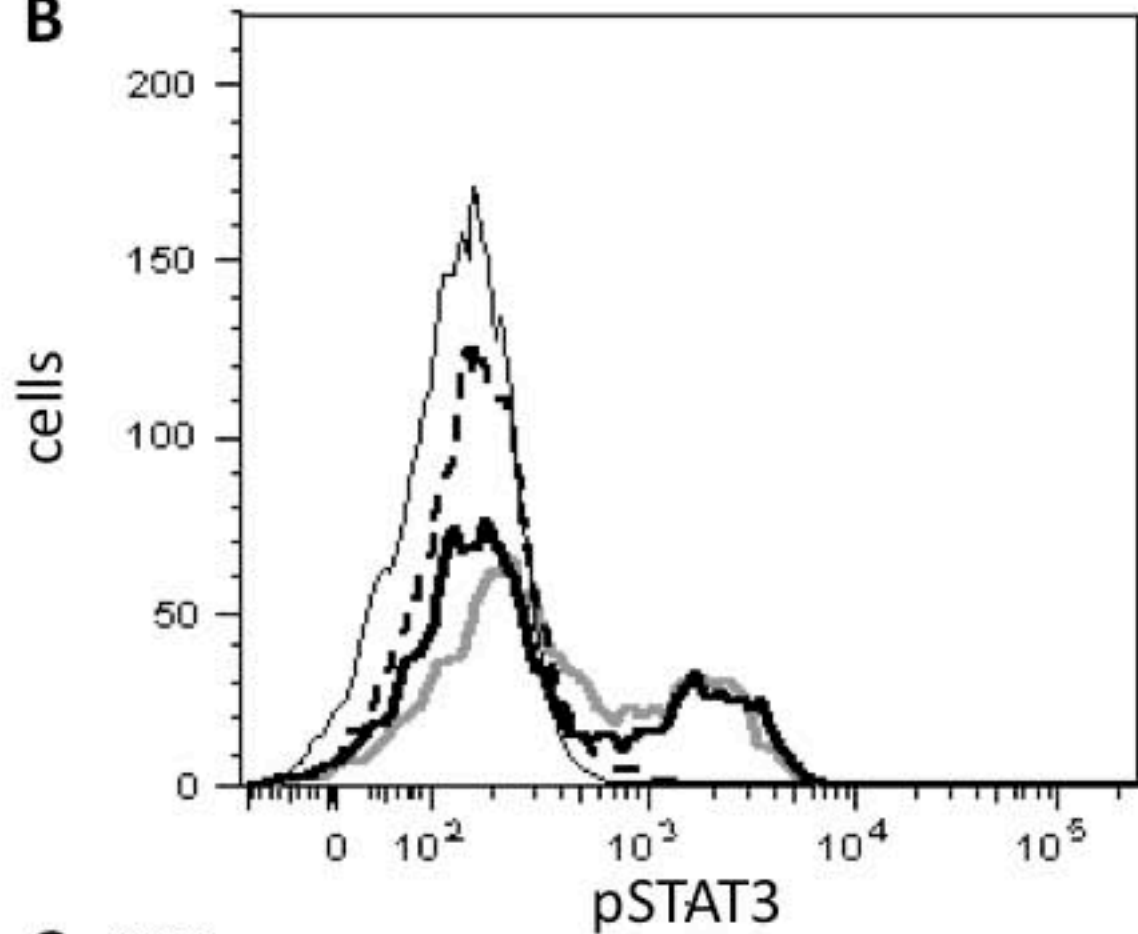**C**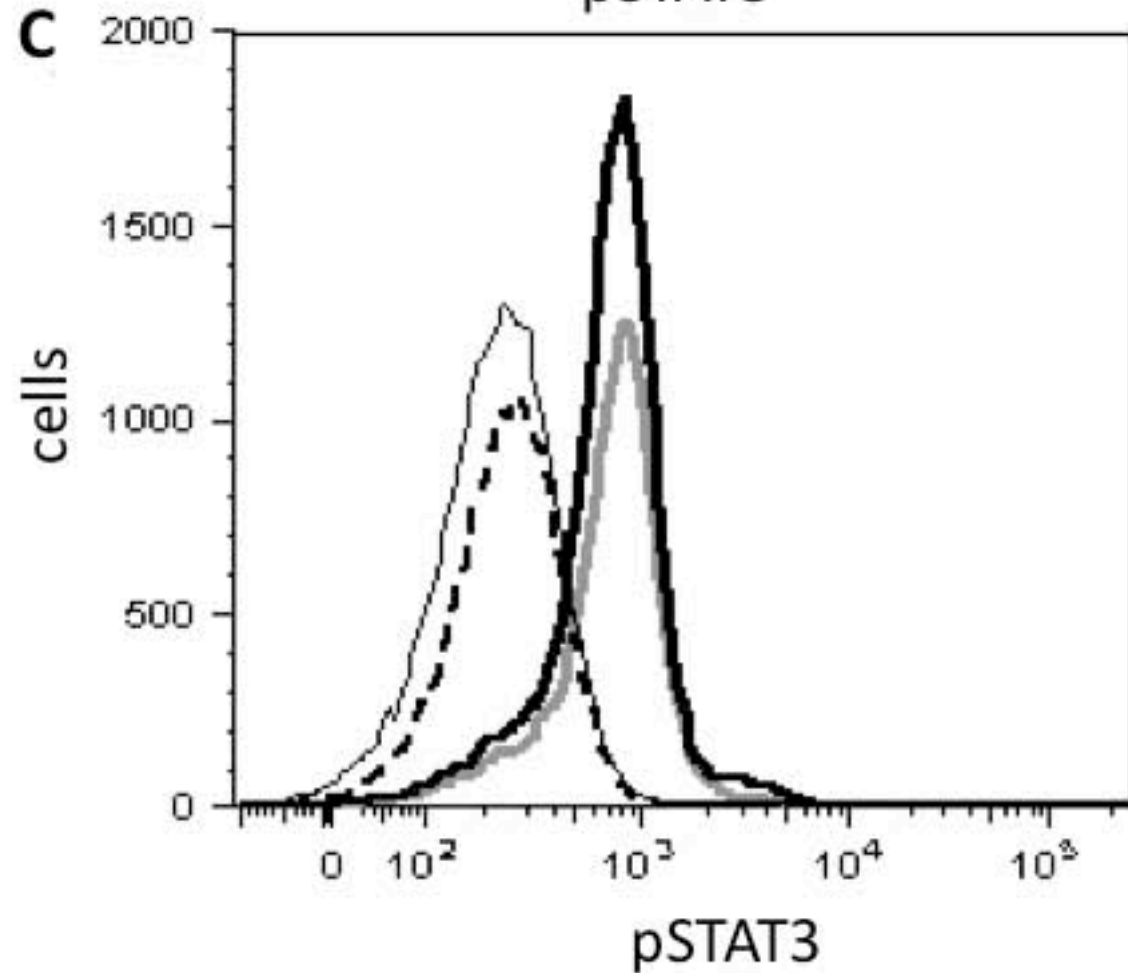

Supplement: MOESM6 [file 9694858]
